# Supplementary material
Source: publisher figshare collection journal article supplement (https://acs.figshare.com/ndownloader/files/4206706)

## SUPPORTING INFORMATION

### EXPERIMENTAL METHODS:

**Protein Purification:** Full-length and fragments of HopPmaL from *Pseudomonas syringae* pv. *maculicola* str. ES4326 (gi|19071504|) and HopAB1 from *P. syringae* pv. *phaseolicola* str. 1448A (HopAB1<sub>p<sub>ph</sub>1448a</sub>, gi |71725172|) were cloned into the expression plasmid p15TvLic, and the plasmid was transformed into *E. coli* BL21(DE3)-RIL or BL21(DE3)-RIPL (Stratagene). Following solubility assessment in test expression experiments, 1 L of *E. coli* cells containing the HopAB fragments were grown for x-ray crystallography or NMR; for X-ray crystallography, selenomethione-enriched protein was produced following growth at 18°C of cells in SeMet high-yield media (Shanghai Medicilon).

Briefly, for crystal structure determination, cells were grown at 37°C to an OD<sub>600</sub> of 1.0 and induced overnight with IPTG at a temperature of 18°C. Cell pellets were then dissolved in 500 mM NaCl, 20 mM HEPES (pH 7.5), 0.5 mM TCEP and 5 mM imidazole and lysed by sonication and centrifuged to remove cell debris. Proteins were isolated from the lysates by batch nickel affinity chromatography (Qiagen), followed by washing the beads extensively (~50 column volumes) of this buffer plus 30 mM imidazole. Protein was eluted with 250 mM imidazole in this same buffer until no further protein could be eluted from the beads. However, the hexahistidine tag was not cleaved from the protein; instead the purified protein was dialyzed overnight with the lysis buffer

at 4°C, and the next day the dialyzed protein was concentrated to ~20-25 mg/ml and used for crystallization trials.

Samples for screening by NMR spectroscopy were purified from *E. coli* cells grown overnight at 37°C on auto-inducing minimal M9 media (1) containing  $^{15}\text{NH}_4\text{Cl}$  as the nitrogen source and 5 g/L glucose and 2 g/L lactose as the carbon source, supplemented with  $\text{ZnSO}_4$ , thiamine, and biotin. Frozen cell pellets were thawed in 500 mM NaCl, 20 mM Tris, 5 mM imidazole (pH 8.0) and lysed by sonication. The proteins were extracted from the lysates by batch nickel affinity chromatography (Qiagen), followed by washing the beads three times with five column volumes of 500 mM NaCl, 20 mM Tris (pH 8.0), 30 mM imidazole. Protein was eluted with five column volumes of 500 mM imidazole in this same buffer. Aliquots of the purified proteins were dialysed against different NMR screening buffers and  $^{15}\text{N}$ - $^1\text{H}$  HSQC spectra were acquired for each condition. For the 2D  $^{15}\text{N}$ - $^1\text{H}$  HSQC spectra shown, proteins were dialysed into a buffer containing 450 mM NaCl, 10  $\mu\text{M}$   $\text{ZnSO}_4$ , 10 mM DTT, 0.01 %  $\text{NaN}_3$ , 1 mM benzamidine and 95%  $\text{H}_2\text{O}$ /5%  $\text{D}_2\text{O}$ ; samples of HopPmaL[1-138], HopPmaL[281-385] and HopPmaL[232-385] also contained 10 mM sodium acetate, pH 5.0, the sample of HopAB1<sub>Pph1448A</sub>[1-90] also contained 10 mM MOPS, pH 6.5, and the sample of HopPmaL[218-307] also contains 10 mM Bis-Tris pH 6.0.

For NMR structure determination of HopPmaL[281-385] and HopAB1<sub>Pph1448</sub>[220-320], *E. coli* cells were grown in 0.5 L of 2X M9 minimal medium containing  $^{15}\text{NH}_4\text{Cl}$  and  $^{13}\text{C}$ -glucose as the sole nitrogen and carbon source, respectively and supplemented with  $\text{ZnSO}_4$ , thiamine, and biotin. Cells were grown at 37°C to an  $\text{OD}_{600}$  of 1.0, followed by adding 1 mM isopropyl  $\beta$ -D-thiogalactoside (IPTG). The

temperature was reduced to 15 °C, and cells grew overnight before harvesting. Protein purification of the doubly-labeled proteins is the same as described for NMR screening but the hexahistidine tag was cleaved with TEV protease and the mixture passed through a nickel affinity column. The purified protein was concentrated, and buffer was exchanged by ultrafiltration and dilution/reconcentration into the NMR buffer containing 10 mM Tris (pH 7.0), 300 mM NaCl, 10 mM DTT, 1 mM benzamidine, 0.01% NaN<sub>3</sub>, 1 x inhibitor cocktail (Roche Applied Science), 95%H<sub>2</sub>O/5% D<sub>2</sub>O.

The cytoplasmic domain (residues 268-615) of the *Arabidopsis thaliana* protein BAK1 (gi 18418211) was cloned into the expression vector pET28GST-LIC, which contains sequences for Glutathione S-transferase (GST), a hexahistidine affinity tag and a thrombin cleavage site upstream of the cloned gene (see [www.sgc.utoronto.ca/SGC-WebPages/Vector.../pET28GST-LIC.pdf](http://www.sgc.utoronto.ca/SGC-WebPages/Vector.../pET28GST-LIC.pdf)). The plasmid was transformed into *E. coli* BL21(DE3)-RIL (Stratagene). Following solubility tests, 1 L of *E. coli* cells containing this BAK1 plasmid were grown in 1 L LB and induced at an OD of 0.8 for 4.5 hours at 30°C. Cell pellets were then dissolved in 20 mM HEPES 7.5, 300 mM NaCl, 5% glycerol, 0.5 mM TCEP, a home-made protease inhibitor cocktail (containing 0.1 M Benzamidine and 0.05 M PMSF dissolved in absolute ethanol as a 500X stock), and 1 mM sodium pyrophosphate, and centrifuged to remove cell debris. Proteins were isolated from the lysates by batch affinity chromatography with glutathione Sepharose 4B (GE Healthcare), followed by washing the beads extensively with this buffer to remove unbound cell extract. Protein was eluted with 9 column volumes of 50 mM Tris 8.0, 0.2 M NaCl and 10 mM reduced glutathione. Protein then was exchanged into the lysis

buffer and concentrated to 25 mg/ml and stored by flash freezing small aliquots in liquid N<sub>2</sub>.

**Protein Crystallization:** Crystallization trials were performed at room temperature using hanging-drop vapor diffusion with an optimized sparse matrix crystallization screen (2). HopPmaL fragments spanning from residue 54 to 232 (HopPmaL[54-232]) and from 135 to 273 (HopPmaL[135-273]) were crystallized only after use of the partial proteolysis technique (3). HopPmaL[54-232] was concentrated to 25 mg/ml, and the HopPmaL[54-232] crystal used for data collection was grown in a crystallization liquor containing 100 mM HEPES pH 7.5, 100 mM sodium chloride, 1.6M ammonium sulphate and 0.02 mg/ml thermolysin. HopPmaL[135-273] was concentrated to 22 mg/ml, and the crystal used for data collection was grown in a crystallization liquor containing 0.1M Bis-Tris pH6.5, 1.5M ammonium sulfate and 0.03 mg/ml chymotrypsin. Prior to data collection, crystals were cryoprotected using Paratone-N oil (Hampton Research) and flash-frozen in liquid nitrogen.

**Data Collection, Structure Determination and Refinement :** The HopPmaL[54-232] and HopPmaL[135-273] structures were solved using crystals derived from selenomethionine-enriched protein with SAD phasing using the anomalous signal collected from APS beamline 19-ID using a peak wavelength of  $\lambda=0.97942$  Å. Diffraction data were integrated and scaled using HKL-2000 (4). Positions of heavy atoms were found using SHELXD (5), followed by solvent flattening using SHELXE (6), which was in turn used to automatically build an initial model using ArpWARP (7),

which was all used within the CCP4 program suite (8). The model was then improved by alternate cycles of manual building and water-picking using COOT (9) and restrained refinement against a maximum-likelihood target with 5% of the reflections randomly excluded as an  $R_{\text{free}}$  test set. These refinement steps were performed using REFMAC (10) in the CCP4 program suite, however additional refinements using TLS parameterization (11, 12) within CCP4, and Phenix.refine from the PHENIX crystallography suite (13) were also performed. The final model for each contains a single molecule of the HopPmaL Pto kinase-binding domain, representing residues 139-217 for HopPmaL[54-232] plus thermolysin, and residues 140-217 for HopPmaL[135-273] plus chymotrypsin; the final models were refined to an  $R_{\text{work}}$  and  $R_{\text{free}}$  of 18.6% and 21.8% for the thermolysin structure and 19.0% and 21.6% for the chymotrypsin structure, respectively. Data collection, phasing and structure refinement statistics for the HopPmaL crystal structures are summarized in Table S1. The Ramachandran plot generated by PROCHECK (14) showed very good stereochemistry overall with all residues in the most favored and additional allowed regions. HopPmaL[54-232] and HopPmaL [135-273] are target APC40104.6 and APC40132.2 of the Midwest Center for Structural Genomics, respectively.

**NMR Spectroscopy:** The NMR experiments were carried out at 25°C on either a Bruker Avance 600 or 800 MHz NMR Spectrometer equipped with cryogenic probes.  $^{15}\text{N}$   $T_1$  and  $T_2$  relaxation data were acquired using pseudo-2D  $^{15}\text{N}$ -edited relaxation experiments on a Bruker Avance 600 MHz NMR Spectrometer at 25° (15). All 3D spectra employed non-uniformly sampling scheme in the indirect dimensions and were reconstructed by multi-dimensional decomposition software MDDNMR (16) (17),

interfaced with NMRPipe (18). The automated program FAWN (19) was used for the backbone assignments from HNCO, CBCA(CO)NH, HBHA(CO)NH, HNCA, and  $^{15}\text{N}$ -edited NOESY-HSQC spectra. Aliphatic side chain assignments relied on (H)CCH-TOCSY and H(C)CH-TOCOSY spectra (20, 21). Aromatic ring resonances were assigned using 3D  $^{13}\text{C}$ -edited NOESY spectra. Stereospecific valine and leucine methyl assignments were obtained as described (22) on the basis of the  $^{13}\text{C}$ - $^{13}\text{C}$  one-bond couplings in a high resolution 2D  $^1\text{H}$ - $^{13}\text{C}$  HSQC spectrum of 7%-  $^{13}\text{C}$ , 100%-  $^{15}\text{N}$  HopPmaL[281-385] and HopAB1<sub>Pph1448a</sub>[220-320]. Nearly complete resonance assignments for HopPmaL[281-385] (98.5% backbone, 97.5% side-chain) were obtained. For HopAB1<sub>Pph1448a</sub>[ 220-320], a total of 81 of the 94 expected backbone peaks were observed in the  $^{15}\text{N}$ - $^1\text{H}$  HSQC recorded at 25° and pH 7.0. The thirteen missing amide resonances are Gly221, Leu222, His235, Asn236, His237, Ser238, Ile267, Met 268, Ser269, Leu270, Leu273, Val301 and Thr319. Ninety-one percent of the C and H resonances for all side chains have been assigned.

**NMR Structure Calculation:** Distance restraints for structure calculations were derived from cross-peaks in  $^{15}\text{N}$ -edited NOESY-HSQC ( $\tau_m = 100$  ms),  $^{13}\text{C}$ -edited aliphatic and aromatic NOESY-HSQC in  $\text{H}_2\text{O}$  ( $\tau_m = 100$  ms) respectively. NOE peaks were picked with intensities using the program SPARKY (Goddard and Kneller 2003, <http://cgl.ucsf.edu/home/sparky>). Initial structure calculations were performed using the program CYANA 3.0 integrated with the noeassign module for automated NOE assignments (23). A total of 144 phi and psi torsion angle restraints for HopPmaL[281-385] and 136 phi and psi torsion angle restraints for HopAB1<sub>Pph1448a</sub>[220-320] were

derived from the program TALOS+ (24). Hydrogen bond restraints were applied only for the helical regions as judged by NOE patterns and chemical shifts and supported by TALOS+. A total of 94.0% and 95.8% of NOESY peaks were assigned for HopPmaL[281-385] and HopAB1<sub>Pph1448a</sub> [220-320], respectively, in cycle 7. The quality of noeassign/CYANA calculation was assessed by NMR structure quality assessment scores (NMR PRF scores) (25). Recall, Precision, F-measure and DP scores were 0.926, 0.950, 0.938, 0.779, respectively, for HopPmaL[281-385], and 0.942, 0.919, 0.930 and 0.738, respectively, for HopAB1<sub>Pph1448a</sub> [220-320]. The best 20 of 100 CYANA structures from the final cycle were subjected to restrained molecular dynamics simulation in explicit water by the program CNS (26, 27). The final structures were inspected by PROCHECK (28) and MolProbity (29) using the NESG validation software package PSVS (30). The validation reports are accessible at [www.nesg.org](http://www.nesg.org). HopPmaL[281-385] and HopAB1<sub>Pph1448a</sub> [220-320] are target PsT2A and PsT3A of the Northeast Structural Genomics Consortium, and target APC40104.5 and APC40132.4 of the Midwest Center for Structural Genomics, respectively. Structures were visualized using the program MOLMOL (31) and Pymol (<http://pymol.sourceforge.net>, Delano Scientific).

## REFERENCES

1. Studier, F. W. (2005) *Protein Expr Purif* 41, 207-34.
2. Kimber, M. S., Vallee, F., Houston, S., Necakov, A., Skarina, T., Evdokimova, E., Beasley, S., Christendat, D., Savchenko, A., Arrowsmith, C. H., Vedadi, M., Gerstein, M., and Edwards, A. M. (2003) *Proteins* 51, 562-8.
3. Dong, A., Xu, X., Edwards, A. M., Chang, C., Chruszcz, M., Cuff, M., Cymborowski, M., Di Leo, R., Egorova, O., Evdokimova, E., Filippova, E., Gu, J., Guthrie, J., Ignatchenko, A., Joachimiak, A., Klostermann, N., Kim, Y., Korniyenko, Y., Minor, W., Que, Q., Savchenko, A., Skarina, T., Tan, K.,

- Yakunin, A., Yee, A., Yim, V., Zhang, R., Zheng, H., Akutsu, M., Arrowsmith, C., Avvakumov, G. V., Bochkarev, A., Dahlgren, L. G., Dhe-Paganon, S., Dimov, S., Dombrovski, L., Finerty, P., Jr., Flodin, S., Flores, A., Graslund, S., Hammerstrom, M., Herman, M. D., Hong, B. S., Hui, R., Johansson, I., Liu, Y., Nilsson, M., Nedyalkova, L., Nordlund, P., Nyman, T., Min, J., Ouyang, H., Park, H. W., Qi, C., Rabeh, W., Shen, L., Shen, Y., Sukumard, D., Tempel, W., Tong, Y., Tresagues, L., Vedadi, M., Walker, J. R., Weigelt, J., Welin, M., Wu, H., Xiao, T., Zeng, H., and Zhu, H. (2007) *Nat Methods* 4, 1019-21.
4. Otwinowski, Z., and Minor, W. (1997) in *Methods in Enzymology* pp 307-326.
  5. Schneider, T. R., and Sheldrick, G. M. (2002) *Acta Crystallogr D Biol Crystallogr* 58, 1772-9.
  6. Sheldrick, G. M. (2008) *Acta Crystallogr A* 64, 112-22.
  7. Perrakis, A., Morris, R., and Lamzin, V. S. (1999) *Nat Struct Biol* 6, 458-63.
  8. (1994) *Acta Crystallogr D Biol Crystallogr* 50, 760-3.
  9. Emsley, P., and Cowtan, K. (2004) *Acta Crystallogr D Biol Crystallogr* 60, 2126-32.
  10. Murshudov, G. N., Vagin, A. A., and Dodson, E. J. (1997) *Acta Crystallogr D Biol Crystallogr* 53, 240-55.
  11. Winn, M. D., Murshudov, G.N. & Papiz, M.Z. (2003) in *Methods Enzymol.* pp 300-321
  12. Winn, M. D., Isupov, M. N., and Murshudov, G. N. (2001) *Acta Crystallogr D Biol Crystallogr* 57, 122-33.
  13. Afonine P.V., Grosse-Kunstleve R.W, and P.D, A. (2005) *CCP4 NEWSLETTER ON PROTEIN CRYSTALLOGRAPHY* 42.
  14. Laskowski R A, M. M. W., Moss D S & Thornton J M (1993) *J. Appl. Cryst.* 26, 283-291.
  15. Farrow, N. A., Muhandiram, R., Singer, A. U., Pascal, S. M., Kay, C. M., Gish, G., Shoelson, S. E., Pawson, T., Forman-Kay, J. D., and Kay, L. E. (1994) *Biochemistry* 33, 5984-6003.
  16. Gutmanas, A., Jarvoll, P., Orekhov, V. Y., and Billeter, M. (2002) *J Biomol NMR* 24, 191-201.
  17. Orekhov, V. Y., Ibraghimov, I., and Billeter, M. (2003) *J Biomol NMR* 27, 165-73.
  18. Delaglio, F., Grzesiek, S., Vuister, G. W., Zhu, G., Pfeifer, J., and Bax, A. (1995) *J Biomol NMR* 6, 277-93.
  19. Lemak, A., Gutmanas, A., Chitayat, S., Karra, M., Fares, C., Sunnerhagen, M., and Arrowsmith, C. H. *J Biomol NMR* 49, 27-38.
  20. Bax, A., Vuister, G. W., Grzesiek, S., Delaglio, F., Wang, A. C., Tschudin, R., and Zhu, G. (1994) *Methods Enzymol* 239, 79-105.
  21. Kay, L. E. (1997) *Biochem Cell Biol* 75, 1-15.
  22. Neri, D., Szyperski, T., Otting, G., Senn, H., and Wuthrich, K. (1989) *Biochemistry* 28, 7510-6.
  23. Guntert, P. (2004) *Methods Mol Biol* 278, 353-78.
  24. Shen, Y., Delaglio, F., Cornilescu, G., and Bax, A. (2009) *J Biomol NMR* 44, 213-23.



25. Huang, Y. J., Powers, R., and Montelione, G. T. (2005) *J Am Chem Soc* 127, 1665-74.
26. Brunger, A. T., Adams, P. D., Clore, G. M., DeLano, W. L., Gros, P., Grosse-Kunstleve, R. W., Jiang, J. S., Kuszewski, J., Nilges, M., Pannu, N. S., Read, R. J., Rice, L. M., Simonson, T., and Warren, G. L. (1998) *Acta Crystallogr D Biol Crystallogr* 54, 905-21.
27. Linge, J. P., Williams, M. A., Spronk, C. A., Bonvin, A. M., and Nilges, M. (2003) *Proteins* 50, 496-506.
28. Laskowski, R. A., Rullmann, J. A., MacArthur, M. W., Kaptein, R., and Thornton, J. M. (1996) *J Biomol NMR* 8, 477-86.
29. Lovell, S. C., Davis, I. W., Arendall, W. B., 3rd, de Bakker, P. I., Word, J. M., Prisant, M. G., Richardson, J. S., and Richardson, D. C. (2003) *Proteins* 50, 437-50.
30. Bhattacharya, A., Tejero, R., and Montelione, G. T. (2007) *Proteins* 66, 778-95.
31. Koradi, R., Billeter, M., and Wuthrich, K. (1996) *J Mol Graph* 14, 51-5, 29-32.
32. Thompson, J. D., Gibson, T. J., and Higgins, D. G. (2002) *Curr Protoc Bioinformatics Chapter 2*, Unit 2 3.

*Table S1:* Data Collection and Refinement Statistics for the HopPmaL Pto-binding domain

|                                            | HopPmaL[54-232]<br>(thermolysin) | HopPmaL[135-273]<br>(chymotrypsin) |
|--------------------------------------------|----------------------------------|------------------------------------|
| <b>Data collection</b>                     |                                  |                                    |
| Space group                                | <i>P41212</i>                    | <i>P41212</i>                      |
| Cell dimensions                            |                                  |                                    |
| <i>a</i> , <i>c</i> (Å)                    | 57.3, 55.7                       | 57.4, 54.8                         |
| Wavelength (Å)                             | 0.97942                          | 0.97942                            |
| Resolution (Å)                             | 50-1.75 (1.78-1.75)              | 50-1.65(1.68-1.65)                 |
| <i>R</i> <sub>merge</sub> (%) <sup>a</sup> | 0.071(0.428)                     | 0.080(0.501)                       |
| <i>I</i> /σ <i>I</i>                       | 43.4(3.9)                        | 42.1(3.6)                          |
| Completeness (%)                           | 99.9(100.0)                      | 99.9(100.0)                        |
| Redundancy                                 | 9.2(9.4)                         | 9.3(9.5)                           |
| <b>Refinement</b>                          |                                  |                                    |
| Resolution (Å)                             | 25.6-1.80                        | 25.7-1.70                          |
| No. reflections                            | 9038(432)                        | 10558(510)                         |
| <i>R</i> <sub>work</sub> (%) <sup>b</sup>  | 18.6                             | 19.0                               |
| <i>R</i> <sub>free</sub> (%) <sup>c</sup>  | 21.8                             | 21.6                               |
| No. atoms                                  |                                  |                                    |
| Protein                                    | 673                              | 682                                |
| Water                                      | 71                               | 82                                 |
| Other                                      | 15                               | 19                                 |
| B-factors (Å <sup>2</sup> )                |                                  |                                    |
| Overall                                    | 23.8                             | 21.4                               |
| Protein                                    | 22.6                             | 19.9                               |
| Water                                      | 30.8                             | 29.1                               |
| Other                                      | 43.9                             | 43.1                               |
| r.m.s. deviations                          |                                  |                                    |
| Bond lengths (Å)                           | 0.007                            | 0.008                              |
| Bond angles (°)                            | 1.0                              | 1.1                                |
| Ramachandran Plot                          |                                  |                                    |
| % in Most Favored Regions                  | 96.5                             | 96.5                               |
| % in Additionally Allowed Regions          | 3.5                              | 3.5                                |
| % in Disallowed Regions                    | 0.0                              | 0.0                                |

Notes:

Values in parentheses are for the highest-resolution shell.

$$^a R_{\text{merge}} = \sum_{hkl} |I - \langle I \rangle| / \sum_{hkl} I$$

<sup>b</sup>  $R_{\text{work}} = \sum |F_{\text{obs}} - F_{\text{calc}}| / \sum |F_{\text{obs}}|$ , where  $F_{\text{obs}}$  and  $F_{\text{calc}}$  are the observed and the calculated structure factors, respectively.

<sup>c</sup>  $R_{\text{free}}$  calculated using 5% of total reflections randomly chosen and excluded from the refinement

Table S2. Structural statistics for the ensemble calculated for the HopPmaL[281-385] and HopAB1<sub>Pph1448</sub>[220-320] solution structures

|                                                 | HopPmaL[281-385] |         | HopAB1 <sub>Pph1448</sub> [220-320] |         |
|-------------------------------------------------|------------------|---------|-------------------------------------|---------|
| <b>Distance restraints<sup>a</sup></b>          |                  |         |                                     |         |
| All                                             | 2705             |         | 2079                                |         |
| Intra-residue (i = j)                           | 415              |         | 351                                 |         |
| Sequential ( i-j  = 1)                          | 694              |         | 468                                 |         |
| Medium range (2 ≤  i-j  ≤ 4)                    | 894              |         | 678                                 |         |
| Long range ( i-j  > 4)                          | 702              |         | 582                                 |         |
| Hydrogen bonds                                  | 30x2             |         | 27x2                                |         |
| <b>Dihedral angle restraints<sup>b</sup></b>    |                  |         |                                     |         |
| All, φ, ψ                                       | 144, 72, 72      |         | 136, 68, 68                         |         |
| <b>r.m.s.d from experimental restraints</b>     |                  |         |                                     |         |
| Distance (Å)                                    | 0.0189 ± 0.0008  |         | 0.0150 ± 0.0009                     |         |
| Dihedral angle (°)                              | 0.1278 ± 0.0941  |         | 0.1700 ± 0.0796                     |         |
| <b>r.m.s.d from idealized covalent geometry</b> |                  |         |                                     |         |
| bond (Å)                                        | 0.0146 ± 0.0002  |         | 0.0144 ± 0.0002                     |         |
| bond angles (°)                                 | 0.9623 ± 0.0135  |         | 0.9292 ± 0.0186                     |         |
| <b>CNS energy (kcal/mol)</b>                    |                  |         |                                     |         |
| Total                                           | -2832 ± 106      |         | -2775 ± 61                          |         |
| Van der Waals                                   | -643 ± 22        |         | -633 ± 10                           |         |
| Electrostatic                                   | -3647 ± 91       |         | -3466 ± 52                          |         |
| <b>r.m.s.d from mean structure<sup>b</sup></b>  |                  |         |                                     |         |
| Backbone atoms                                  | 0.28 ± 0.05      |         | 0.39 ± 0.05                         |         |
| All heavy atoms                                 | 0.58 ± 0.06      |         | 0.82 ± 0.04                         |         |
| <b>Ramachandran plot (%)<sup>b</sup></b>        |                  |         |                                     |         |
| Residues in most favored regions                | 95.1             |         | 93.4                                |         |
| Residues in additional allowed regions          | 4.9              |         | 6.6                                 |         |
| <b>Global quality scores<sup>c</sup></b>        |                  |         |                                     |         |
|                                                 | Raw              | Z-score | Raw                                 | Z-score |
| Verify3D                                        | 0.34             | -1.93   | 0.35                                | -1.77   |
| ProsaII                                         | 0.80             | 0.62    | 0.88                                | 0.95    |
| Procheck (phi-psi) <sup>b</sup>                 | 0.08             | 0.63    | 0.16                                | 0.94    |
| Procheck (all) <sup>b</sup>                     | -0.25            | -1.48   | -0.09                               | -0.53   |
| MolProbity clash                                | 16.45            | -1.30   | 14.33                               | -0.93   |

NMR structure consists of an ensemble of the 20 lowest energy structures out of 100 calculated.

<sup>a</sup>No distance restraint was violated by > 0.5 Å and no dihedral restraint was violated by > 5° in either ensemble of 20 lowest energy structures

<sup>b</sup>Rmsd values for residues 308-384 of HopPmaL[281-385] and residues 239-267, 271-315 of HopAB1<sub>Pph1448</sub>[220-320].

<sup>c</sup>Calculated from NESG PSVS program (Bhattacharry et al. 2007)

**Figure S1.** (A) Superimposition of AvrPtoB[120-205] residues 124-200 (from PDB 3H GK)(green cartoon) with HopPmaL residues 139-217 (cyan cartoon, left panel). As with Figure 2, N and C represents the N- and C-terminus of AvrPto[120-205], while N' and C' represents the N- and C-terminus of the HopPmaL fragment. (B) Close-up of the putative Pto-binding region of HopPmaL[139-217] with residues expected to bind Pto based on the AvrPtoB[120-205] structure shown in a stick representation and labeled.

**Figure S2.** (A) Superimposition of the 20 lowest energy structures of HopPmaL[281-385] and HopAB1<sub>Pph1448a</sub>[220-320]. Regions of secondary structure are labeled. (B) Superimposition of residues 305-385 and 237-320 from the NMR structures of HopPmaL [281-385] and HopAB1<sub>Pph1448a</sub>[220-320], respectively. N- and C-termini are labeled as are the secondary structure elements. Residues potentially involved in binding a target kinase are shown in a stick representation and labeled; these residues are similar to those shown in Figure 2, and lie within helix C, D and the loop between these two helices. Colouring of the different molecules is similar to that used in Figure 1 and 2.

**Figure S3.** Sequence alignment of of HopPmaL[308-385] (HopPmaL<sub>cterm</sub>) and HopAB1<sub>Pph1448a</sub>[239-316](HopAB1<sub>1448a</sub>) with the middle domains of other HopAB alleles and the N-terminal Pto-binding domains of AvrPtoB (AvrPtoB<sub>3HGL</sub>) and HopPmaL (HopPmaL<sub>nterm</sub>), generated using ClustalX (32). The positions of helices (red ovals) and loop regions (black lines) in the HopPmaL C-terminal and N-terminal domain are shown above and below the sequence alignment, respectively. Helices are labeled using the nomenclature described earlier, where nt and ct refer to the N-terminal

and C-terminal domains of HopPmaL, respectively. Brown boxes above the sequence of the HopPmaL C-terminal domain indicate residues in HopPmaL[281-385] which were buried in the hydrophobic core, showing limited conservation with the N-terminal Pto-binding domain. Green boxes below the sequence of the HopPmaL N-terminal domain represent residues of the AvrPtoB N-terminal domain whose side chains interact with the Pto kinase. Other sequences are derived from HopAB alleles from *Pseudomonas savastanoi* str. ITM317 (virPphAPsv, g.i.|75401898|), *P. syringae* pv. *glycinea* str. 49a/90 (virPphAPgy, g.i. |75401901|), *P. syringae* pv. *syringae* str. B728a (HopAB1\_B728a, g.i. |66047883|), *Pseudomonas avellanae* (HopAB\_avellanae, g.i. 146327848), *P. syringae* pv. *tomato* str. JL1065 (HopAB3\_Psesm, g.i. |94717621|), *P. syringae* pv. *tomato* str. T1 (HopAB3\_T1, g.i. |213970380|) and *P. syringae* p.v. *theae* (HopAB3\_theae, gi. |146327850|).

**Figure S4.** Titration of GST-BAK1[268-615] into a sample of 0.2 mM  $^{15}\text{N}$ -labeled HopPmaL[281-385]. Three  $^{15}\text{N}$ - $^1\text{H}$  HSQC spectra are shown at HopPmaL/BAK1 ratios of (A) 1:0.28, (B) 1:0.56 and (C) 1:1.4. Prior to titration, both proteins were dialysed into a buffer containing 10 mM Tris 7.0 and 300 mM NaCl.

**Figure S5.** (A) Representative  $^{15}\text{N}$ - $^1\text{H}$  HSQC spectrum for HopPmaL[1-138] (B) Representative  $^{15}\text{N}$ - $^1\text{H}$  HSQC spectrum for HopAB1<sub>Pph1448a</sub>[1-90]. (C) Representative  $^{15}\text{N}$ - $^1\text{H}$  HSQC spectrum for HopPmaL[218-307].

**A**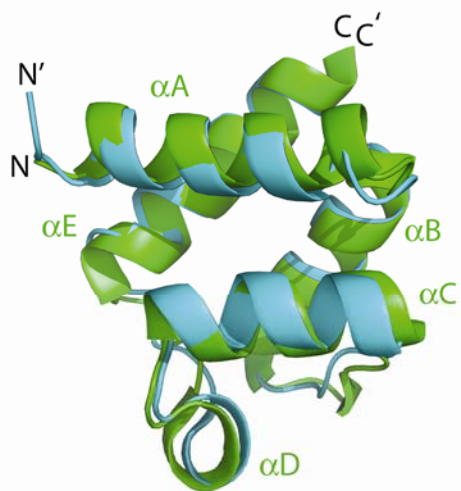

**AvrPtoB[124-200]**  
**HopPmaL[139-217]**

**B**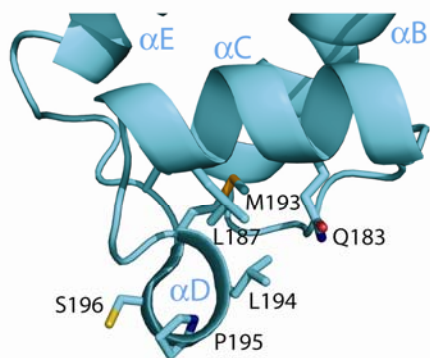

**HopPmaL[139-217]**

**A**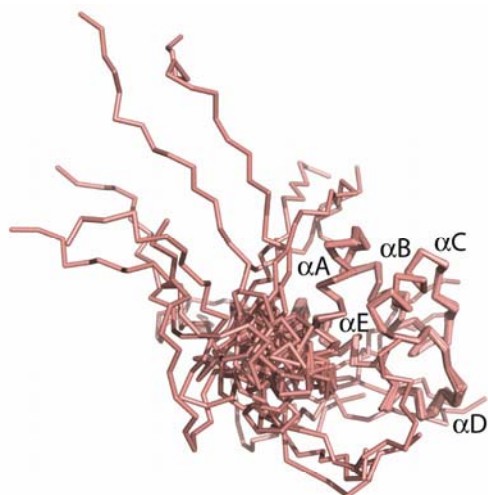**HopPmaL[281-385]**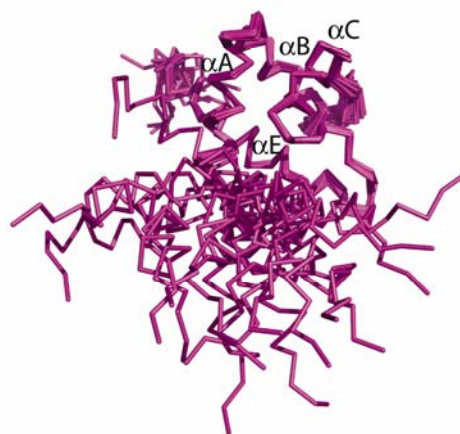**HopAB1<sub>Pph1448a</sub>[220-320]****B**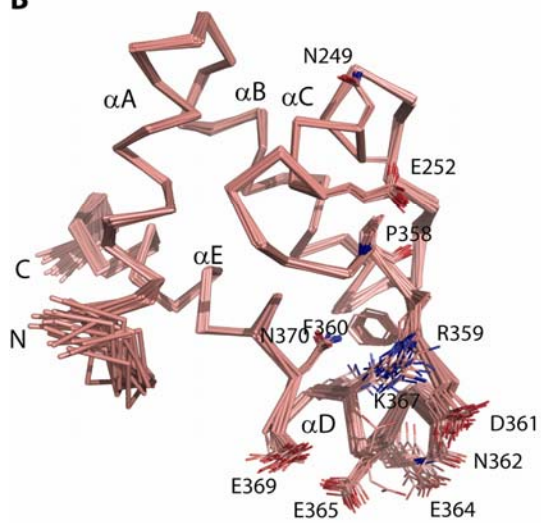**HopPmaL[305-385]**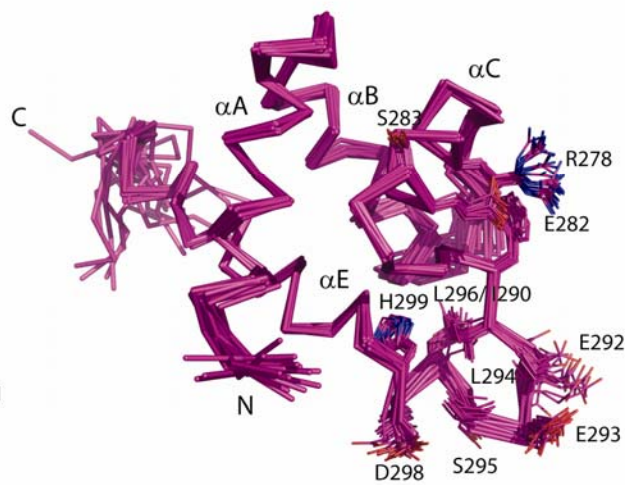**HopAB1<sub>Pph1448a</sub>[237-320]**

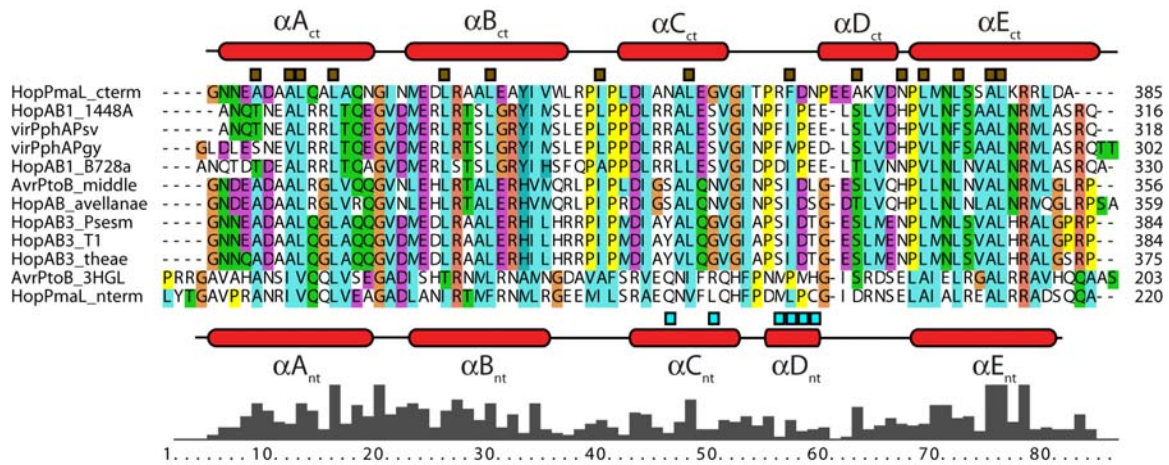



A.

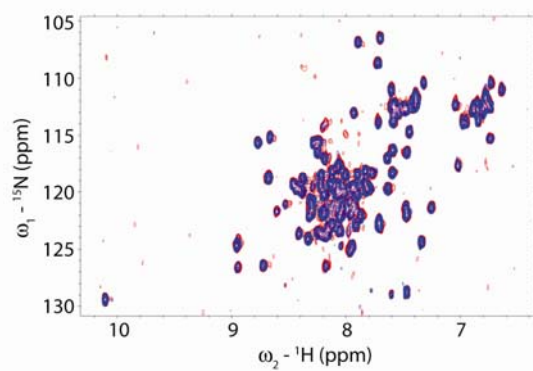

B.

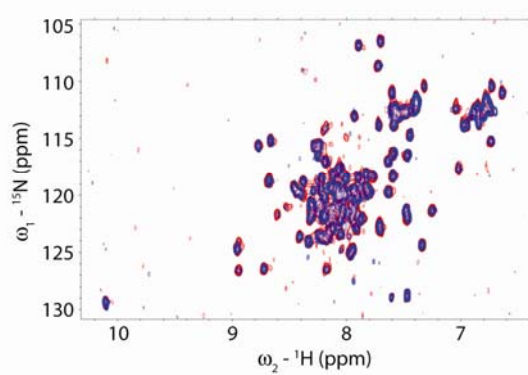

C.

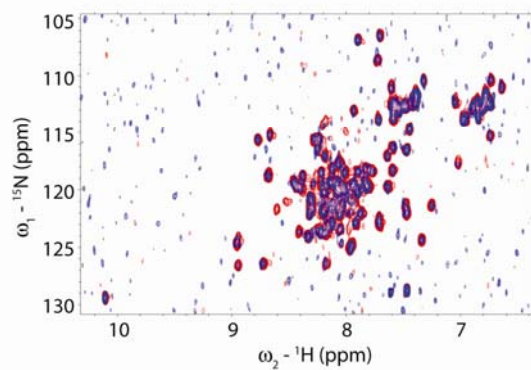

**A. HopPmaL[1-138]**

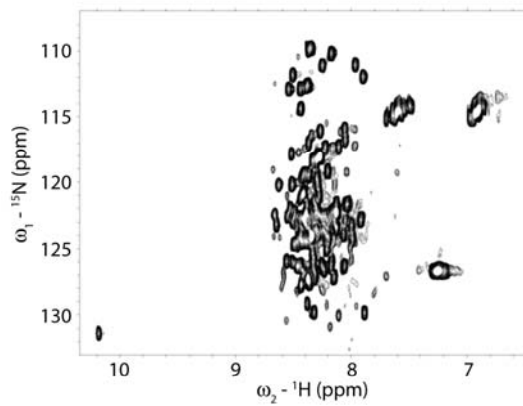

**B. HopAB1<sub>Pph1448a</sub>[1-90]**

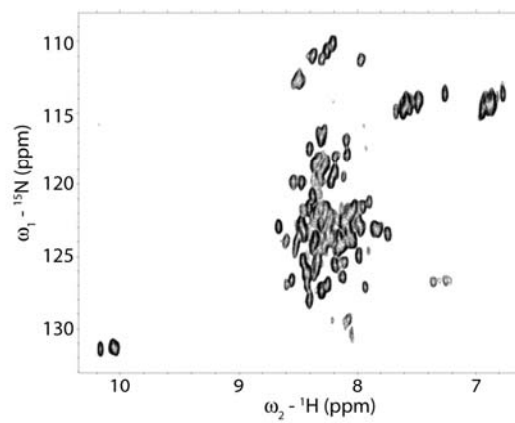

**C. HopPmaL[218-307]**

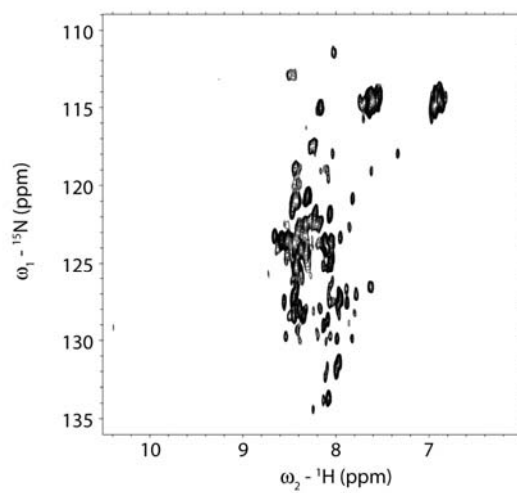

Supplement: Supplementary file 1 [file 4206706]
